# Supplementary material for: Functional identification of BpMYB21 and BpMYB61 transcription factors responding to MeJA and SA in birch triterpenoid synthesis
Source: PubMed Central journal article supplement (PMC7422618; doi:10.1186/s12870-020-02521-1), 2020-08-12
Supplement: 12870_2020_2521_MOESM1_ESM.pdf [file 12870_2020_2521_MOESM1_ESM.pdf]

### **Nucleotide sequence of BpMYB21 from birch**

TCGCCATCATCCTCTCTCTCTCACTTTCTCTCCGTCTCTATCTGTCTGTCTCACACAAACACACTCTT  
CTATCAAAGTATTGATCACAAAGTTTTGTGAAGATACAATGGGAAAATCTCCTTGTGTGAAAAAGATGG  
AATAAAGAAAGGTCCATGGACTGCTGAGGAAGATCAGAAACTGGTTGATTATATTCAAAGCATGGACA  
CGGTAGATGGCGAATCCTTCCTAAGAATGCAGGTTTGAAAAGGTGTGGAAAGAGCTGCCGGCTTCGCTG  
GACAAACTATTTGAGACCTGACATCAAGAGAGGGAGGTTTTTCGTATGAAGAAGAAGAGACCATAATACA  
ACTGCACGGTGTTTTTGGGAAATAAGTGGTCCGCTATTGCTGCTCACTTGCCAGGAAGAACAGATAATGA  
GATTAAGAACTATTGGAACACCCACATCAGAAAAAGGCTACTAAGAATGGGAATTGATCCAGTGACTION  
CACCCCACGCCTTGATCTTCTCGAACTCTACTCAATTCTGAACTCATCTCAACTTAATCTCCCCAGTTT  
GCTAGGGATTGGACCTATTGTCAACCCGAATCTCCTGAGTCTAGCCACAGCTCTCTTGTTCATCCCAATG  
CAAAAACCCCGATACTAATTCTCAATATCTTCAGCAAAAACCAACTTGATGACAATATTTCCAATTGAAAA  
CCAGTTCAGTCCACCCAACCAATTCAGCCAAACACAACCTATTTCTCACAAGCACCCTACTAAACTC  
TCTAAGCACTCCCTTTCAAAGTGAAACCCAGCTGACAGATCAACCCAAAAATGGAGCAAATCTCTCCAGA  
TTTTACCAATTTTAGCTGCCAAAATTTGTACCAAATTTATGGCAAAAATAACGGACAGAATCCTGCAGG  
TTTAGCTATGAGCGATATTCTGTACCATGATCAGCGCGTACCAAATTTTCAGCTTTGGCTCTCTTATTTT  
GACAGATTCATCTAGCGATCCCACTCCCTAAATTCATCTTCTACTATCACCTATGCCAACTGTAGCAC  
TGAAGATGAGAGGGATAGTTACTGCAGCAACATTTTGATGTATGATATGCCAAATAGCTTGACTGCCCG  
TGGATTGCATATGTAA

### **Amino acid sequence of ORF of BpMYB21 from birch**

MGKSPCCEKDGIKKGPWTAEEEDQKLVLDYIQKHGHGRWRILPKNAGLKRCGKSCRLRWTNYLRPDIKRGR  
FSYEEEEETIIQLHGVLGNKWSAIAAHLPGRTDNEIKNYWNTHIRKRLLRMGIDPVTHTPRLDLELYSI  
LNSSQLNLPSSLGIGPIVNPNNLSLATALSSQCKNPDTNSQYLQQNQLDDNIP IENQFQSTQPIQPNT  
TYFSQAPLLNLSLSTPFQSETQLTDQPKMEQISPDFTNFSCQNSVFNWQNNQNPAGLAMSDILYHDQR  
VPNFSFGSLISTDSSSDPTPLNSSSTITYANCSTEDERDSYCSNILMYDMPNSLTARGLHM
