# Supplementary material for: Functional identification of BpMYB21 and BpMYB61 transcription factors responding to MeJA and SA in birch triterpenoid synthesis
Source: PubMed Central journal article supplement (PMC7422618; doi:10.1186/s12870-020-02521-1), 2020-08-12
Supplement: 12870_2020_2521_MOESM2_ESM.pdf [file 12870_2020_2521_MOESM2_ESM.pdf]

**Nucleotide sequence of BpMYB61 from birch**

TCTCTCTCTCTCTCTCTCTCTAAACATCTTTTCTACTCCACAACCTCCCTTAAAAATCCATTTTCAGAGCCAC  
CTCTAGCCGTTGCTGACAGTTCTCTTAGGATTCAACAAAAATTGCTGCTGTTTTAAGGATAGCTTCTCCC  
TCATAGCAGGTGGGTCTTGCTCTAAAAATGGGGAGGCACTCTTGCTGTTACAAGCAGAAGCTAAGGAAAG  
GCCTTTGGTACCCAGAGGAGGATGAGAAGCTTCTGAGGCATATTACCAAGTATGGTCATGGCTGTTGGA  
GCTCTGTTTCTAAGCAAGCCGGTCTGCAGAGGTGTGGGAAGAGCTGCAGATTGAGGTGGATCAACTACT  
TGAGGCCTGATTTGAAGAGAGGTACATTCTCGCAGGAGGAAGAGAATCTCATAATCGAACTTCATGCAG  
TTCTCGGGAACAGGTGGTCTCAGATTGCAGCACAATTGCCTGGAAGAACCGACAATGAAATAAAAAATC  
TATGGAACCTTTGCTTGAAGAAGAAGCTGAGGCAGAGAGGTATTGACCCCGTCACCCACAAACCAATTT  
CCGAAGTGGAGAACGGAGAGGAGGATAAAAGATACAGAAACCAAAGACAAAATGTCGGTGGTAT  
CCAATGAACTCAATCTCCTCAAGGCAGAAAGTTCAAGGCAAGAATCCCCAATTGCTGCACAAGGCTACC  
GATTGGAAGTGCAGGGTAACAATTTGATGACACCCACAGCTAACAATGATTTCTCCACCAAGATACTT  
CCACAACCAACTGCCAGCCGTGAGAGTTGGTGGGACATTTTCCGCTTCAGCAATTGAATTATGTATCCA  
ATGCCACAAACTCCAACCCACGCAGTGGTTCACCCAAAGTGGGAAATCGTTTGATATGAATTCTGAGT  
TTGCTCCATGCTACCAAACTCTATTGGTTACAAGCCTTCGCTTACTTTTCCCGCCGACAATGTATCCA  
TGAGCTCTTTCACAGTGAATGGATCCCGTACTGGGAAGGCAGTGGCGCCGCCGCCACCAACAGCAACA  
GCGGAAGCAGCAGCAGCGCTGAGTTGCAAAGCAACAGCTCCTTGCTGGAGAACAGCATGTTTTCGTGGG  
GATTGGCTGATTGTGGCACATCAGATAAGGAGACCCAAACCCATCTGACCGAAGACATCAAGTGGGCAG  
AATATTTTAATAACCCATTATTGATGGCGGCTGCTTTACAAAATCAAACACCACAGTGTTTATACAATG  
AGATAAAATCAGAAACGCATTTGGTGACCGATACTTCAACTGCTATGTGGGCACATCATAACAAGCAGC  
AGGGATCTTTGCAGACTCACTCTGAAAGACTTGCCGCGGCTTTGGACATACTTAA

**Amino acid sequence of ORF of BpMYB61 from birch**

MGRHSCCYKQKLRKGLWSPEEDEKLLRHI TKYGHGCWSSVPKQAGLQRCGKSCRLRWINYLRPDLKRG  
FSQEEENLI IELHAVLGNRWSQIAAQLPGRDNEIKNLWNSCLKKKLRQRGIDPVTHKPISEVENGEED  
KDTETKSKDKMSVVSNELNLKAESSRQESPIAAQGYRLEVQGNNLMTPTANNDFLHQDTSTTNCQNSE  
LVGHFPLQQLNYVSNATNSNPTQWFTQSGKSFDMNSEFASMLPNSIGYKPSLTFPADNVSMSSFTVNGS  
RYWEGSGAAATNSNSGSSSSAELQSNSSLENSMFSWGLADCGTSDKETQTHLTEDIKWAEYFNNPLLM  
AAALQNQTPQCLYNEIKSETHLVTDTSTAMWAHHNKQQGSLQTHSERLAAAFGHT
