# Supplementary material for: Functional identification of BpMYB21 and BpMYB61 transcription factors responding to MeJA and SA in birch triterpenoid synthesis
Source: PubMed Central journal article supplement (PMC7422618; doi:10.1186/s12870-020-02521-1), 2020-08-12
Supplement: 12870_2020_2521_MOESM3_ESM.pdf [file 12870_2020_2521_MOESM3_ESM.pdf]

Genebank ID:

BpMYB21: MF574045

*Populus trichocarpa*: XP\_002316936.1, EEE97548.1

*Vitis vinifera*: CAN81932.1, XP\_002266049.1

*Cephalotus follicularis*: GAV67420.1

*Eriobotrya japonica*: AOQ26224.1

*Prunus persica*: XP\_007212865.1, ONI12921.1

*Populus euphratica*: XP\_011029391.1, XP\_011014456.1

*Nicotiana attenuata*: XP\_019229348.1, OIT30152.1

*Ziziphus jujuba*: XP\_015896599.1

*Fragaria vesca* subsp. *Vesca*: XP\_004293589.1

*Nicotiana glauca*: XP\_009801248.1

*Nicotiana glauca*: XP\_016436111.1

*Prunus mume*: XP\_008226723.1

*Juglans regia*: XP\_018823636.1

*Nelumbo nucifera*: XP\_010277911.1

*Macleaya cordata*: OVA07982.1

*Jatropha curcas*: XP\_012091477.1, KDP20873.1, AIT52303.1

*Hevea brasiliensis*: XP\_021664638.1

*Manihot esculenta*: XP\_021606635.1, OAY54974.1

BpMYB61: KT344120

*Ricinus communis*: XP\_015572455.1

*Phaseolus vulgaris*: XP\_007145085.1, ESW17079.1

*Glycine max*: XP\_003519722.1, KHN00250.1, KRH69136.1

*Betula luminifera*: ACJ38663.1

*Populus nigra*: BAR45573.1

*Juglans regia*: XP\_018843144.1, XP\_011040042.1

*Epimedium sagittatum*: AFH03054.1

*Theobroma cacao*: XP\_007051325.1, EOX95482.1

*Citrus clementina*: XP\_006444636.1, ESR57876.1

*Gossypium raimondii*: XP\_012480219.1, KJB09540.1

*Gossypium hirsutum*: XP\_016695803.1

*Jatropha curcas*: XP\_012083029.1, KDP28358.1, AIT52238.1

*Populus tomentosa*: AIA66961.1

*Populus trichocarpa*: XP\_002320929.1, EEE99244.1

*Manihot esculenta*: OAY48816.1

*Vitis vinifera*: XP\_002281027.1

*Citrus sinensis*: XP\_006492438.1, KDO86760.1

*Lupinus angustifolius*: OIV91042.1

*Gossypium arboreum*: XP\_017612658.1, KHF98976.1
