# Supplementary material for: Functional identification of BpMYB21 and BpMYB61 transcription factors responding to MeJA and SA in birch triterpenoid synthesis
Source: PubMed Central journal article supplement (PMC7422618; doi:10.1186/s12870-020-02521-1), 2020-08-12
Supplement: 12870_2020_2521_MOESM4_ESM.pdf [file 12870_2020_2521_MOESM4_ESM.pdf]

**Promoter sequences of the BpMYB21 from birch.**

AGTGTAGTAGCATAGGTACGTAGTGTACTCCAGGAGCAGGGCATTGTATGGTTCTAGCAATTTCTTGGC  
CACGGTGATGCTCTTATGCAAATCCTCTTCGTTGGTTTTGTTCATTGTCAATCCTGAGGTGGACATTTCT  
CCTGCAAATGAATCGGAACGAGGGCTGTATTGTGGAGTCCGGTCACTTGTAGCACATCACCAATACG  
ATAACGGTATAGTCCATAATCATTACCAAAAAACCTTATCATTTATGGTAATACAAAAAGCCCAGCTT  
TTGATGTTACACTGTCCTTGGTATAATCTTTCTTTTTAATCTCTACTCATGACTTTCATCGAATGTTAC  
ACTCTCCGATGCTTATTACCTAATGTGACAATTGTAACCTCAGTTTACTCTCTTTCTGCAATTGCCACA  
TCAAATAAATAAGCACTTGGGTGTAAGAGCTTATTACCTAATGTGACAGTTGCCACGTGATCTTTCT  
ATTATAACGTTTTTTAAGCAATTGAGAATGTAAAAAGCTTATCGTTAATGGTTGGTAATACAAAAAG  
AAAAGCTTTTGAAGTATAATCTTTTTCACTGACTTTCGTCTATTAGAGAAATGTTACATCAACTCTTTT  
TGTTTTTTTACATTATTAAGAGCTTGTACCTGATGTAAGTAACAATTGTCACGTCAGCTTTATACTAC  
AGCGTTTTTTAATTCTCATATGCTTACTCTCTTTCTAGTGTAAGACTGTAAGAGGGAGATGAGATGA  
GGAAGTGAAGGTGGGAAGGTTGGTTGAGAAGGCAGATGAGATGAGGAAGGTTGCTCAAGTTCAGCTG  
AAGCATTTTCATGTGCCTGTTGCTCTTTTCAATGACTTTTTCTTCGACTTCTTTTCAAGTTTTTCCCACGC  
TTCTTTTCTTCCCTTGATTTACATTTAGCGTTTGTTCCTTTGTTTTTCTGAGCTCCCCCATTCCTTT  
TCTTTTCCCTGTTAATTTGGATAAGCCCGTTTCCACTCAATATGTCTAGCGAGCGACGAAACTAGAAA  
TAGAAATTCAACTTGTAACGGCTCTTCTGTTCAAGAAATGAAATGTATTACTGGCATAATATCTACGATT  
GGATTCAAAAAAGCGTAGAAGGGCCAGGTTGCATCAAAAAATAATTCTAGAGGCCAAAAATAAGAAGAA  
AAAAAAGTACATGAACTATTTTTTGTAAACAAATTTAAAGCTCAAAAAAATTTTTAGAGGTGGAGCCCCA  
CCAGCCCCCTTAAATCCGTCTACTATCAAAGTATTGATCACAAGTTTTTGTGAAGATACA

**Promoter sequences of the BpMYB61 from birch.**

AGTGTAGAAGCATAGGCCAGATGGAGTACATGGACAAGCCATGTCTAACCTAGAAGCAGGAGTAACAG  
TGCTTGATCTAAAAGCTCAATGACATGGCTTGAATTGAGGCAGCCTAACCAACCTTAATTTGAAAGACCT  
CCCAACACCTCTATATCGTAGTCGAGGATCACAGATTCTGATGCTAATAACAACACCCAACCTCCTTAG  
AGGTCACCTCTCTTTCAAGCAATAGCAGATGCTTTTGTGATTATGGCTTGTGTAGGGCTTATGGTCGTG  
TTTGATTGGTTTCATATTAATCTGCAATCTTGATGCGTCTCTCTACTGTTACATGCATGGGTTTTAA  
TATGCATATGTTGGGGTAAAACCCACCTGACAAAACCTAGGCGCAAGTAACAAGAGATGGGAATTTCCA  
ATAATCATCCAATACTGGAACAGATAGCAAAACCATTTCAAAACACTGAACTCGACCCAGTGGCTGAACA  
TTGCCTATTGAACTGAACTATATTCAGATCCCTCAAACAAAAGCAAATAGTAATAACAATAATATGAA  
GCAAAAGAGCAAGAATTCAGGCAGATAAACCGGTAACCTGAAAACTAACAGAGCTTACAAGGTGCGA  
AGGATTCATCTTTGCCTTCAATGAGGACTCTACTTGTTCCTTTGTCACCCCATCTCCCTCTCTCTCTC  
TCTCTCTCTCTCGCTAAACATCTTTTCTACTCCACAACCTCCCTTAAAAATCCATTTAGAGCCACCTCT  
AGCCGTTGCTGACAGTTCTCCTAGGATTCACAAAAATTGCTGCTGTTTTAAGGATAGCTTCTCCCTCAT  
AGCAGGCGGGTCTTGCTCTAAA
